# Supplementary material for: Reassessment of Split-Leg Signs in Amyotrophic Lateral Sclerosis: Differential Involvement of the Extensor Digitorum Brevis and Abductor Hallucis Muscles
Source: Front Neurol. 2019 May 29;10:565. doi: 10.3389/fneur.2019.00565 (PMC6548849; doi:10.3389/fneur.2019.00565)
Supplement: Supplementary file 1 [file Table_1.XLSX]

## Sheet: 工作表1
Supplementary table 1. Diagnostic performance of F-wave parameters in ALS patients with unaffected legs
Parameters	Cut-off value	Sensitivity(%)	Specificity(%)	Youden Index	AUC(95%CI)	P-value
EDB
Min F latency(ms/m)	25.9722	72	68	0.4	0.743(0.647-0.839)	＜0.001
Max F latency(ms/m)	29.1457	76	76	0.52	0.834(0.756-0.912)	＜0.001
Mean F latency(ms/m)	27.3009	76	66	0.42	0.769(0.678-0.861)	＜0.001
F-wave chronodispersion(ms)	5.35	72	82	0.54	0.800(0.713-0.888)	＜0.001
F-wave pesistence(%)	49.5	72	54	0.26	0.561(0.446-0.676)	0.293
Mean F amplitude(µV)	175.5	54	88	0.42	0.705(0.601-0.808)	＜0.001
Mean F/M amplitude ratio(%)	2.1802	64	70	0.34	0.695(0.591-0.799)	0.001
Max F/M amplitude ratio(%)	5.16465	66	56	0.22	0.621(0.511-0.731)	0.037
Index Freps(%)	27.3348	78	78	0.56	0.807(0.721-0.894)	＜0.001
AH
Min F latency(ms/m)	27.4217	38	80	0.18	0.600(0.489-0.712)	0.084
Max F latency(ms/m)	31.0817	30	98	0.28	0.660(0.553-0.766)	0.006
Mean F latency(ms/m)	29.4062	26	98	0.24	0.622(0.512-0.732)	0.035
F-wave chronodispersion(ms)	5.15	56	76	0.32	0.677(0.570-0.783)	0.002
F-wave pesistence(%)	99.5	2	100	0.02	0.510(0.396-0.624)	0.863
Mean F amplitude(µV)	489.5	52	94	0.46	0.742(0.643-0.841)	＜0.001
Mean F/M amplitude ratio(%)	2.45526	50	80	0.3	0.634(0.524-0.745)	0.021
Max F/M amplitude ratio(%)	5.97252	30	94	0.24	0.612(0.502-0.723)	0.053
Index Freps(%)	1.5	12	100	0.12	0.560(0.447-0.673)	0.301
HCs, healthy controls; EDB, extensor digitorum brevis muscle; HA, abductor halluces muscle; AUC, area under the curve; CI, confidence interval. Values with significant differences printed in bold characters.
